# Supplementary material for: Potassium Application Improves Grain Yield and Alleviates Drought Susceptibility in Diverse Maize Hybrids
Source: PubMed Central journal article supplement (PMC7020434; doi:10.3390/plants9010075), 2020-01-07
Supplement: plants-09-00075-s001.pdf [file plants-09-00075-s001.pdf]

Table S1. Weather data during the period of experimentation

| Month     | Minimum temperature (°C) |      | Maximum temperature (°C) |      | Monthly rainfall (mm) |      |
|-----------|--------------------------|------|--------------------------|------|-----------------------|------|
|           | 2017                     | 2018 | 2017                     | 2018 | 2017                  | 2018 |
| July      | 28.1                     | 28   | 39.9                     | 40.2 | 40                    | 25   |
| August    | 27.7                     | 27.5 | 38.8                     | 38.7 | 30                    | 35   |
| September | 25                       | 25.2 | 37.7                     | 37.9 | 08                    | 05   |
| October   | 19.2                     | 18.3 | 35                       | 35.5 | 03                    | 15   |

Table S2. Significance **terms** for irrigation, potassium, maize hybrids and year on 1000 grain weight, grain yield, **biological yield**, **water productivity** and drought susceptibility index as obtained in Layyah, Pakistan.

| Source of variance | 1000 grain weight (g) | Grain yield (kg ha <sup>-1</sup> ) | Biological yield (kg ha <sup>-1</sup> ) | Water productivity  | Drought susceptibility index |
|--------------------|-----------------------|------------------------------------|-----------------------------------------|---------------------|------------------------------|
| Year (Y)           | 24.5 <sup>ns</sup>    | 12.9 <sup>ns</sup>                 | 9.18 <sup>ns</sup>                      | 12.47 <sup>ns</sup> | 4.06 <sup>ns</sup>           |
| Irrigation (I)     | 2316.17**             | 4521.43**                          | 3247.45**                               | 2657.12**           | 2794.09**                    |
| Potassium (K)      | 124.42**              | 239.22**                           | 351.88**                                | 249.77**            | 142.66**                     |
| Hybrid (H)         | 99.09 <sup>ns</sup>   | 82.35**                            | 64.02**                                 | 87.16**             | 106.34**                     |
| I × K              | 14.39**               | 32.42**                            | 21.00**                                 | 36.98**             | 24.22**                      |
| I × H              | 4.72*                 | 5.29*                              | 2.44*                                   | 11.42**             | 2.99*                        |
| I × Y              | 0.65 <sup>ns</sup>    | 0.02 <sup>ns</sup>                 | 0.35 <sup>ns</sup>                      | 0.12 <sup>ns</sup>  | 0.49 <sup>ns</sup>           |
| H × K              | 1.09 <sup>ns</sup>    | 0.45*                              | 0.33*                                   | 1.99*               | 0.53 <sup>ns</sup>           |
| H × Y              | 0.22 <sup>ns</sup>    | 0.43 <sup>ns</sup>                 | 0.76 <sup>ns</sup>                      | 0.27 <sup>ns</sup>  | 0.49 <sup>ns</sup>           |
| K × Y              | 0.22 <sup>ns</sup>    | 0.66 <sup>ns</sup>                 | 0.88 <sup>ns</sup>                      | 1.02 <sup>ns</sup>  | 1.01 <sup>ns</sup>           |
| I × K × H          | 0.42 <sup>ns</sup>    | 0.36 <sup>ns</sup>                 | 0.77 <sup>ns</sup>                      | 0.62 <sup>ns</sup>  | 0.91 <sup>ns</sup>           |
| I × K × Y          | 0.57 <sup>ns</sup>    | 0.26 <sup>ns</sup>                 | 0.11 <sup>ns</sup>                      | 0.45 <sup>ns</sup>  | 0.66 <sup>ns</sup>           |
| Y × K × H          | 0.71 <sup>ns</sup>    | 0.98 <sup>ns</sup>                 | 0.29 <sup>ns</sup>                      | 0.93 <sup>ns</sup>  | 1.18 <sup>ns</sup>           |
| I × H × Y          | 0.45 <sup>ns</sup>    | 0.34 <sup>ns</sup>                 | 0.55 <sup>ns</sup>                      | 0.79 <sup>ns</sup>  | 0.06 <sup>ns</sup>           |
| I × K × H × Y      | 0.53 <sup>ns</sup>    | 0.39 <sup>ns</sup>                 | 0.82 <sup>ns</sup>                      | 0.37 <sup>ns</sup>  | 0.52 <sup>ns</sup>           |
| CV (%)             | 9.72                  | 6.45                               | 14.32                                   | 12.11               | 8.48                         |

<sup>ns</sup> not significant

\* Significant at the 0.05 probability level.

\*\* Significant at the 0.01 probability level.
